# Supplementary material
Source: publisher figshare collection journal article supplement (https://tandf.figshare.com/articles/dataset/_/8247551)
Supplement: Supplementary file 1 [file 1]

## Supplemental tables

Table S1.

Recruitment on bait GLMM results. (A) Comparisons between species in the foraging assay. (B) Comparisons between species in the resource competition assay. (C) Comparisons between assays within *T. magnum*. (D) Comparisons between assays within *L. humile*.

| (A) Foraging assay             |         |              |       |             |                                     |
|--------------------------------|---------|--------------|-------|-------------|-------------------------------------|
| Minute                         | $\beta$ | $SE_{\beta}$ | $t^1$ | $P$         | Outcome                             |
| 10                             | -0.64   | 0.46         | -1.41 | 0.162       | —                                   |
| 20                             | 0.18    | 0.34         | 0.53  | 0.599       | —                                   |
| 30                             | 0.56    | 0.45         | 1.24  | 0.219       | —                                   |
| 40                             | 0.68    | 0.48         | 1.40  | 0.165       | —                                   |
| 50                             | 0.69    | 0.49         | 1.42  | 0.159       | —                                   |
| 60                             | 0.90    | 0.48         | 1.85  | 0.067       | —                                   |
| 70                             | 1.12    | 0.49         | 2.31  | 0.023 *     | <i>L. humile</i> > <i>T. magnum</i> |
| 80                             | 1.08    | 0.48         | 2.23  | 0.028 *     | <i>L. humile</i> > <i>T. magnum</i> |
| 90                             | 1.21    | 0.49         | 2.48  | 0.015 *     | <i>L. humile</i> > <i>T. magnum</i> |
| (B) Resource competition assay |         |              |       |             |                                     |
| 10                             | 0.29    | 0.54         | 0.54  | 0.592       | —                                   |
| 20                             | 1.19    | 0.55         | 2.18  | 0.032 *     | <i>L. humile</i> > <i>T. magnum</i> |
| 30                             | 1.87    | 0.88         | 2.13  | 0.035 *     | <i>L. humile</i> > <i>T. magnum</i> |
| 40                             | 2.45    | 1.03         | 2.37  | 0.020 *     | <i>L. humile</i> > <i>T. magnum</i> |
| 50                             | 2.75    | 1.08         | 2.55  | 0.012 *     | <i>L. humile</i> > <i>T. magnum</i> |
| 60                             | 3.29    | 1.34         | 2.46  | 0.016 *     | <i>L. humile</i> > <i>T. magnum</i> |
| 70                             | 3.04    | 1.22         | 2.49  | 0.014 *     | <i>L. humile</i> > <i>T. magnum</i> |
| 80                             | 3.19    | 1.34         | 2.38  | 0.019 *     | <i>L. humile</i> > <i>T. magnum</i> |
| 90                             | 3.18    | 1.34         | 2.37  | 0.020 *     | <i>L. humile</i> > <i>T. magnum</i> |
| (C) <i>T. magnum</i>           |         |              |       |             |                                     |
| 10                             | -0.57   | 0.60         | -0.94 | 0.346       | —                                   |
| 20                             | -1.91   | 0.52         | -3.73 | < 0.001 *** | Foraging assay > R. c. assay        |
| 30                             | -2.43   | 0.83         | -2.93 | 0.004 **    | Foraging assay > R. c. assay        |
| 40                             | -2.79   | 0.99         | -2.82 | 0.006 **    | Foraging assay > R. c. assay        |
| 50                             | -2.87   | 1.04         | -2.75 | 0.007 **    | Foraging assay > R. c. assay        |
| 60                             | -3.39   | 1.31         | -2.59 | 0.011 *     | Foraging assay > R. c. assay        |
| 70                             | -3.06   | 1.19         | -2.57 | 0.012 *     | Foraging assay > R. c. assay        |
| 80                             | -3.31   | 1.31         | -2.53 | 0.013 *     | Foraging assay > R. c. assay        |
| 90                             | -3.23   | 1.31         | -2.47 | 0.015 *     | Foraging assay > R. c. assay        |
| (D) <i>L. humile</i>           |         |              |       |             |                                     |
| 10                             | 0.37    | 0.63         | 0.58  | 0.563       | —                                   |
| 20                             | -0.89   | 0.39         | -2.27 | 0.025 *     | Foraging assay > R. c. assay        |
| 30                             | -1.12   | 0.53         | -2.09 | 0.039 *     | Foraging assay > R. c. assay        |
| 40                             | -1.02   | 0.57         | -1.79 | 0.076       | —                                   |
| 50                             | -0.81   | 0.56         | -1.43 | 0.155       | —                                   |
| 60                             | -1.00   | 0.56         | -1.77 | 0.080       | —                                   |
| 70                             | -1.14   | 0.56         | -2.02 | 0.046 *     | Foraging assay > R. c. assay        |
| 80                             | -1.20   | 0.56         | -2.13 | 0.036 *     | Foraging assay > R. c. assay        |
| 90                             | -1.26   | 0.56         | -2.24 | 0.027 *     | Foraging assay > R. c. assay        |

<sup>1</sup>df = 103, \* $P$  < 0.05; \*\* $P$  < 0.01; \*\*\* $P$  < 0.001

Table S2.

Recruitment in arena GLMM results. Comparisons between species in the foraging assay.

| Foraging assay |         |              |       |         |     |                                     |
|----------------|---------|--------------|-------|---------|-----|-------------------------------------|
| Minute         | $\beta$ | $SE_{\beta}$ | $t^1$ | $P$     |     | Outcome                             |
| 10             | -1.08   | 0.59         | -1.83 | 0.074   |     | —                                   |
| 20             | 1.78    | 0.47         | 3.80  | < 0.001 | *** | <i>L. humile</i> > <i>T. magnum</i> |
| 30             | 1.92    | 0.53         | 3.65  | < 0.001 | *** | <i>L. humile</i> > <i>T. magnum</i> |
| 40             | 1.83    | 0.56         | 3.29  | 0.002   | **  | <i>L. humile</i> > <i>T. magnum</i> |
| 50             | 1.78    | 0.58         | 3.07  | 0.003   | **  | <i>L. humile</i> > <i>T. magnum</i> |
| 60             | 1.83    | 0.60         | 3.08  | 0.003   | **  | <i>L. humile</i> > <i>T. magnum</i> |
| 70             | 1.95    | 0.61         | 3.20  | 0.002   | **  | <i>L. humile</i> > <i>T. magnum</i> |
| 80             | 1.87    | 0.62         | 3.03  | 0.004   | **  | <i>L. humile</i> > <i>T. magnum</i> |
| 90             | 1.95    | 0.62         | 3.13  | 0.003   | **  | <i>L. humile</i> > <i>T. magnum</i> |

<sup>1</sup>df = 50, \*\* $P$  < 0.01; \*\*\* $P$  < 0.001

Table S3.

Proportional recruitment GLMM results. Comparisons between species in the foraging assay.

| Foraging assay |         |              |       |         |     |                                     |
|----------------|---------|--------------|-------|---------|-----|-------------------------------------|
| Minute         | $\beta$ | $SE_{\beta}$ | $t^1$ | $P$     |     | Outcome                             |
| 10             | 0.41    | 0.40         | 1.02  | 0.314   |     | —                                   |
| 20             | -2.45   | 0.43         | -5.66 | < 0.001 | *** | <i>T. magnum</i> > <i>L. humile</i> |
| 30             | -1.65   | 0.51         | -3.2  | 0.002   | **  | <i>T. magnum</i> > <i>L. humile</i> |
| 40             | -1.27   | 0.50         | -2.53 | 0.015   | *   | <i>T. magnum</i> > <i>L. humile</i> |
| 50             | -1.27   | 0.50         | -2.52 | 0.015   | *   | <i>T. magnum</i> > <i>L. humile</i> |
| 60             | -0.91   | 0.50         | -1.83 | 0.074   |     | —                                   |
| 70             | -0.69   | 0.50         | -1.37 | 0.176   |     | —                                   |
| 80             | -0.55   | 0.50         | -1.09 | 0.280   |     | —                                   |
| 90             | -0.40   | 0.50         | -0.81 | 0.422   |     | —                                   |

<sup>1</sup>df = 48, \* $P$  < 0.05; \*\* $P$  < 0.01; \*\*\* $P$  < 0.001

Table S4.

Intra-specific proportional recruitment one-tailed  $t$ -tests. (A) Proportional recruitment of *T. magnum*. (B) Proportional recruitment of *L. humile*.

| (A) <i>T. magnum</i> |       |       |       |             |               |
|----------------------|-------|-------|-------|-------------|---------------|
| Minute               | Mean  | SE    | $t^1$ | $P$         | Outcome       |
| 10                   | 36.65 | 8.44  | -1.58 | 0.106       | —             |
| 20                   | 56.06 | 6.03  | 1.00  | 0.194       | —             |
| 30                   | 60.56 | 3.23  | 3.27  | 0.023 *     | > 50% on bait |
| 40                   | 64.60 | 3.16  | 4.17  | 0.009 **    | > 50% on bait |
| 50                   | 67.59 | 7.20  | 2.44  | 0.046 *     | > 50% on bait |
| 60                   | 65.55 | 3.06  | 5.08  | 0.007 **    | > 50% on bait |
| 70                   | 67.23 | 1.24  | 13.89 | < 0.001 *** | > 50% on bait |
| 80                   | 66.36 | 5.10  | 3.21  | 0.024 *     | > 50% on bait |
| 90                   | 64.17 | 4.61  | 3.07  | 0.027 *     | > 50% on bait |
| (B) <i>L. humile</i> |       |       |       |             |               |
| 10                   | 34.48 | 24.38 | -0.45 | 0.365       | —             |
| 20                   | 11.92 | 6.99  | -5.45 | 0.006 **    | < 50% on bait |
| 30                   | 23.91 | 7.91  | -3.30 | 0.023 *     | < 50% on bait |
| 40                   | 34.56 | 4.40  | -3.51 | 0.020 *     | < 50% on bait |
| 50                   | 37.97 | 5.66  | -2.12 | 0.062       | —             |
| 60                   | 43.92 | 3.23  | -1.88 | 0.078       | —             |
| 70                   | 51.57 | 1.63  | 0.96  | 0.204       | —             |
| 80                   | 53.76 | 0.64  | 5.87  | 0.005 **    | > 50% on bait |
| 90                   | 54.85 | 1.12  | 4.34  | 0.011 *     | > 50% on bait |

<sup>1</sup>df = 3, *L. humile* minute 10 df = 1, \* $P$  < 0.05; \*\* $P$  < 0.01; \*\*\* $P$  < 0.001

Table S5.

Inter-specific interactions GLMMs results. Comparisons between species in the resource competition assay.

| Behaviour      | $\beta$ | SE $_{\beta}$ | $t^1$ | $P$      | Outcome                             |
|----------------|---------|---------------|-------|----------|-------------------------------------|
| Biting         | 1.83    | 0.66          | 2.78  | 0.006 ** | <i>L. humile</i> > <i>T. magnum</i> |
| Threat display | -2.11   | 0.76          | -2.78 | 0.006 ** | <i>T. magnum</i> > <i>L. humile</i> |
| Gaster flexion | -0.41   | 0.62          | -0.67 | 0.51     | —                                   |
| Avoidance      | 0.33    | 0.60          | 0.56  | 0.58     | —                                   |

<sup>1</sup>df = 121, \*\* $P$  < 0.01
