# Supplementary material
Source: publisher figshare collection journal article supplement (https://tandf.figshare.com/articles/dataset/_/8247551)
Supplement: Supplementary file 2 [file 1]

## Supplemental stats

### Bait discovery time

ANOVA residuals normality: no deviation (Shapiro-Wilk W test,  $W = 0.93$ , NS)

ANOVA residuals homoscedasticity: no deviation (Levene's test,  $F(3,12) = 3.41$ , NS)

### Bait retrieval

Normality of the dependent variable: significant deviation (Shapiro-Wilk W test,  $W = 0.76$ ,  $P > 0.05$ )

Homoscedasticity of the dependent variable between the two species: no deviation (Fligner-Killeen test,  $\chi^2(1) = 1.76$ , NS)

### Recruitment on bait

GLMM residuals normality: no deviation (Kolmogorov-Smirnov test,  $D = 0.09$ , NS)

GLMM residuals homoscedasticity: no deviation (Bartlett's test,  $\chi^2(35) = 45.55$ , NS)

GLMM residuals autocorrelation structure: ARMA(0,2),  $\theta_1 = 0.92$ ,  $\theta_2 = 0.45$

### Recruitment in arena

GLMM residuals normality: no deviation (Kolmogorov-Smirnov test,  $D = 0.13$ , NS)

GLMM residuals homoscedasticity: no deviation (Bartlett's test,  $\chi^2(17) = 18.12$ , NS)

GLMM residuals autocorrelation structure: AR(1),  $\phi_1 = 0.70$

### Proportional recruitment

GLMM residuals normality: no deviation (Kolmogorov-Smirnov test,  $D = 0.09$ , NS)

GLMM residuals homoscedasticity: no deviation (Bartlett's test,  $\chi^2(17) = 20.78$ , NS)

GLMM residuals autocorrelation structure: ARMA(0,1),  $\theta_1 = 0.84$

### Intraspecific proportional recruitment

The normality of the distributions was verified through the Shapiro-Wilk W test. All proportional recruitment data distributions showed no significant deviations from the normal distribution.

*T. magnum* minute 10:  $W = 0.86$ , NS

*T. magnum* minute 20:  $W = 0.94$ , NS

*T. magnum* minute 30:  $W = 0.78$ , NS

*T. magnum* minute 40:  $W = 0.99$ , NS

*T. magnum* minute 50:  $W = 0.89$ , NS

*T. magnum* minute 60:  $W = 0.99$ , NS

*T. magnum* minute 70:  $W = 0.84$ , NS

*T. magnum* minute 80:  $W = 0.91$ , NS

*T. magnum* minute 90:  $W = 0.95$ , NS

*L. humile* minute 10: cannot test normality on sample size  $< 3$

*L. humile* minute 20:  $W = 0.82$ , NS

*L. humile* minute 30:  $W = 0.77$ , NS

*L. humile* minute 40:  $W = 0.88$ , NS

*L. humile* minute 50:  $W = 0.91$ , NS

*L. humile* minute 60:  $W = 0.91$ , NS

*L. humile* minute 70:  $W = 0.92$ , NS

*L. humile* minute 80:  $W = 0.86$ , NS

*L. humile* minute 90:  $W = 0.88$ , NS

### Inter-specific interactions

GLMM residuals autocorrelation structure: no autocorrelation found.
