# Supplementary material
Source: publisher figshare collection journal article supplement (https://tandf.figshare.com/articles/dataset/_/8247551)
Supplement: Supplementary file 3 [file 1]

## Supplemental figures

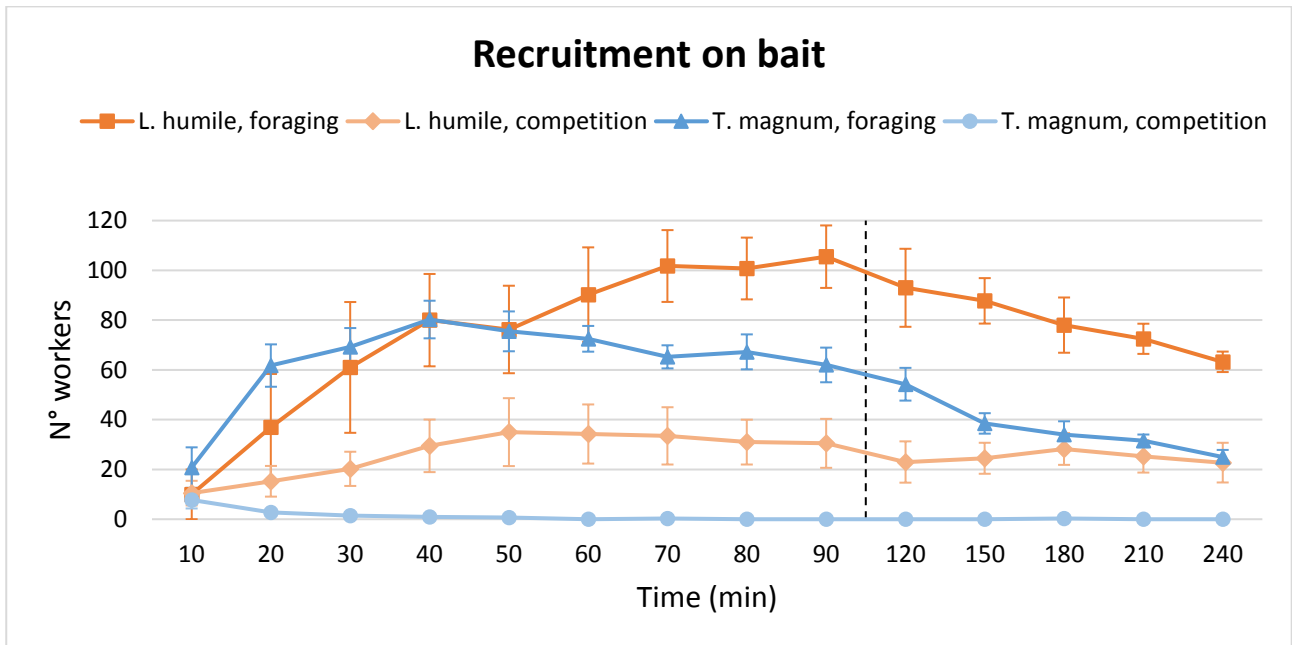

Fig. S1. Mean ( $\pm$  SE) number of *L. humile* and *T. magnum* workers on bait at different time intervals in the foraging assay and in the resource competition assay (for each species\*assay combination:  $n = 4$ ,  $N = 56$ ). The dashed line delimits the time interval investigated in the statistical models.

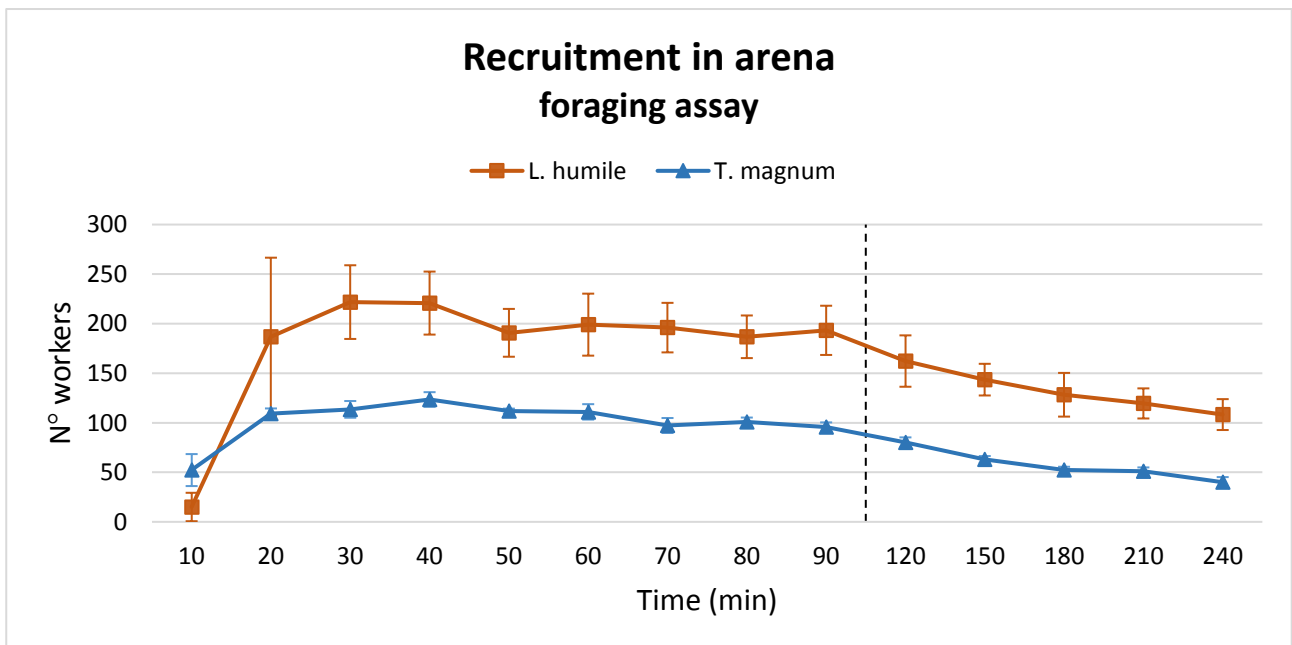

Fig. S2. Mean ( $\pm$  SE) number of *L. humile* and *T. magnum* workers in the arena at different time intervals in the foraging assay (for each species:  $n = 4$ ,  $N = 56$ ). The dashed line delimits the time interval investigated in the statistical models.

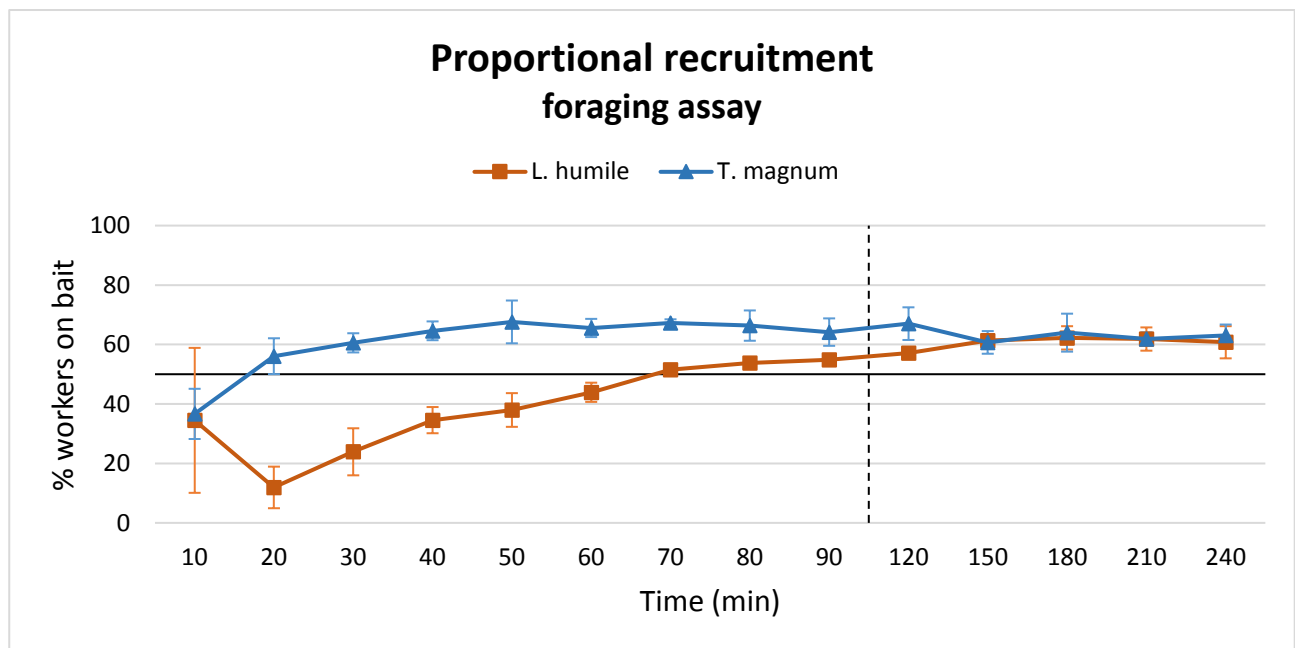

Fig. S3. Mean ( $\pm$  SE) % of *L. humile* and *T. magnum* workers recruited on the bait to the total number of workers present in the arena at different time intervals in the foraging assay (*L. humile*:  $n = 4$ ,  $n = 2$  at 10 min,  $N = 54$ ; *T. magnum*:  $n = 4$ ,  $N = 56$ ). The dashed line delimits the time interval investigated in the statistical models.

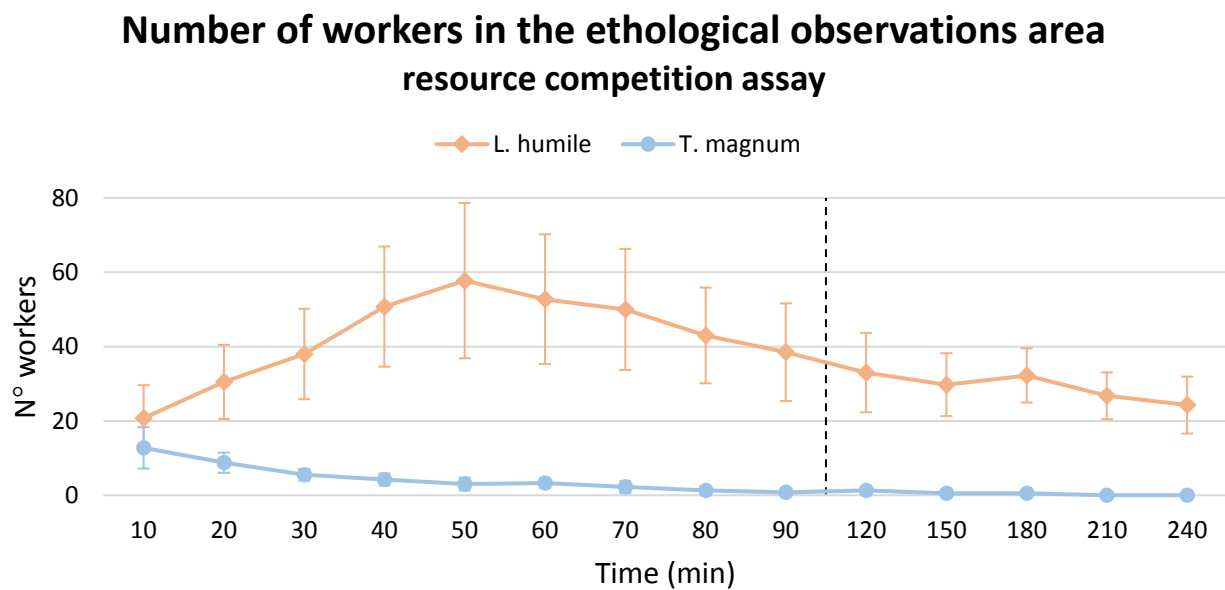

Fig. S4. Mean ( $\pm$  SE) number of *L. humile* and *T. magnum* workers in the ethological observations area at different time intervals in the resource competition assay (for each species:  $n = 4$ ,  $N = 56$ ). The dashed line delimits the time interval investigated in the statistical models.
